# Supplementary material for: Human-Wildlife Conflict at a Suburban–Wildlands Interface: Effects of Short- and Long-Distance Translocations on Red Diamond Rattlesnake (Crotalus ruber) Activity and Survival
Source: MDPI journal article supplement (doi:10.3390/d14020130), 2022-02-11
Supplement: s1 [file s1]

# Codebook

Description of variables for the file "Final Snake Telemetry Data.csv."

Table S2. Codebook for Rattlesnake Telemetry Data.

| Variable Name | Description                                                                                                                                                                                                                                                                                                                                                                                                                                                                                                                                                                                                                               |
|---------------|-------------------------------------------------------------------------------------------------------------------------------------------------------------------------------------------------------------------------------------------------------------------------------------------------------------------------------------------------------------------------------------------------------------------------------------------------------------------------------------------------------------------------------------------------------------------------------------------------------------------------------------------|
| snakeID       | Each snake's ID number                                                                                                                                                                                                                                                                                                                                                                                                                                                                                                                                                                                                                    |
| Type          | The type of location recorded. Integers refer to a location fix on the snake. "Capture" refers to the snake's initial capture location. "Final_Release" refers to the location the snake was released to once it was captured at the end of the study and its transmitter was removed. "Last" refers to a few instances where snake remains were found but not all such locations are recorded. "Release" refers to places a snake was released after initial transmitter implantation or replacement. "Relocate" refers to places a snake was relocated to after it was found in an SHM area and subsequent to transmitter implantation. |
| Date          | Date in 'month/day/year' format                                                                                                                                                                                                                                                                                                                                                                                                                                                                                                                                                                                                           |
| Time          | Local time for the record                                                                                                                                                                                                                                                                                                                                                                                                                                                                                                                                                                                                                 |
| Lat           | Latitude                                                                                                                                                                                                                                                                                                                                                                                                                                                                                                                                                                                                                                  |
| Long          | Longitude                                                                                                                                                                                                                                                                                                                                                                                                                                                                                                                                                                                                                                 |
| X             | X value for UTM coordinates                                                                                                                                                                                                                                                                                                                                                                                                                                                                                                                                                                                                               |
| Y             | Y value for UTM coordinates                                                                                                                                                                                                                                                                                                                                                                                                                                                                                                                                                                                                               |
| SHM.dist      | Distance to nearest significantly modified human area                                                                                                                                                                                                                                                                                                                                                                                                                                                                                                                                                                                     |
